# Supplementary material for: Two-dimensional bimetallic phosphide ultrathin nanosheets as non-noble electrocatalysts for a highly efficient oxygen evolution reaction
Source: Royal Society of Chemistry journal article supplement (doi:10.1039/c8nr10521a), 2019-01-01
Supplement: c8nr10521a1.pdf [file c8nr10521a1.pdf]

## Supporting Information

# Two-Dimensional Bimetallic Phosphide Ultrathin Nanosheets as Non-Noble Electrocatalysts for Highly Efficient Oxygen Evolution Reaction

*Min Jiang,<sup>†,‡</sup> Jun Li,<sup>†,‡</sup> Junming Li,<sup>†,‡</sup> Yu Zhao,<sup>§,‡</sup> Lijia Pan,<sup>§,‡</sup> Qingqi Cao,<sup>†,‡</sup>*

*Dunhui Wang,<sup>\*,†,‡</sup> and Youwei Du,<sup>†,‡</sup>*

<sup>†</sup>National Laboratory of Solid State Microstructures and Jiangsu Provincial Key

Laboratory for Nanotechnology, Nanjing University, Nanjing 210093, China

<sup>‡</sup>Collaborative Innovation Center of Advanced Microstructures, Nanjing University,

Nanjing 210093, China

<sup>§</sup> School of Electronic Science and Engineering, Nanjing University, Nanjing 210093,

China

\*Corresponding author

*E-mail:* wangdh@nju.edu.cn

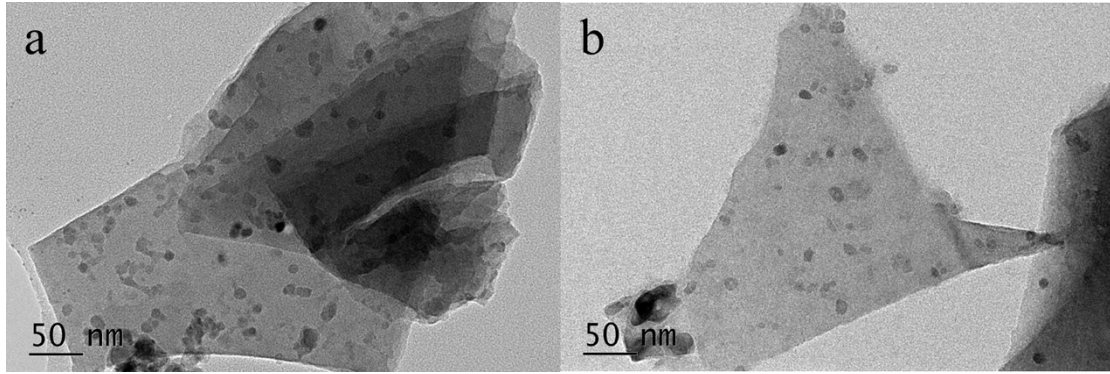

Fig. S1 TEM images of (a)  $\text{Co}_{0.9}\text{Fe}_{0.1}\text{P}$  and (b)  $\text{Co}_{0.7}\text{Fe}_{0.3}\text{P}$  nanosheets.

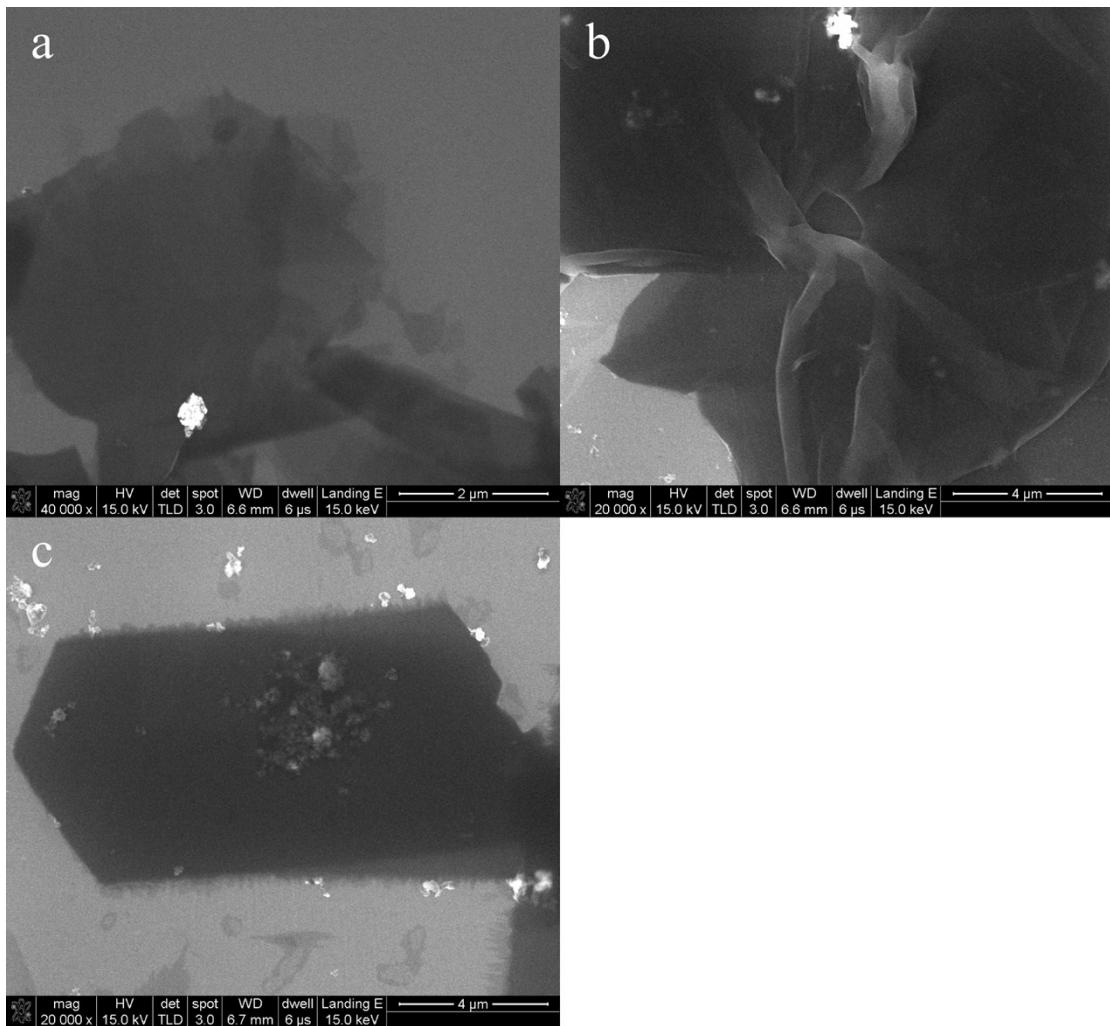

Fig. S2 SEM images of (a) CoP, (b)  $\text{Co}_{0.9}\text{Fe}_{0.1}\text{P}$  and (c)  $\text{Co}_{0.7}\text{Fe}_{0.3}\text{P}$  nanosheets.

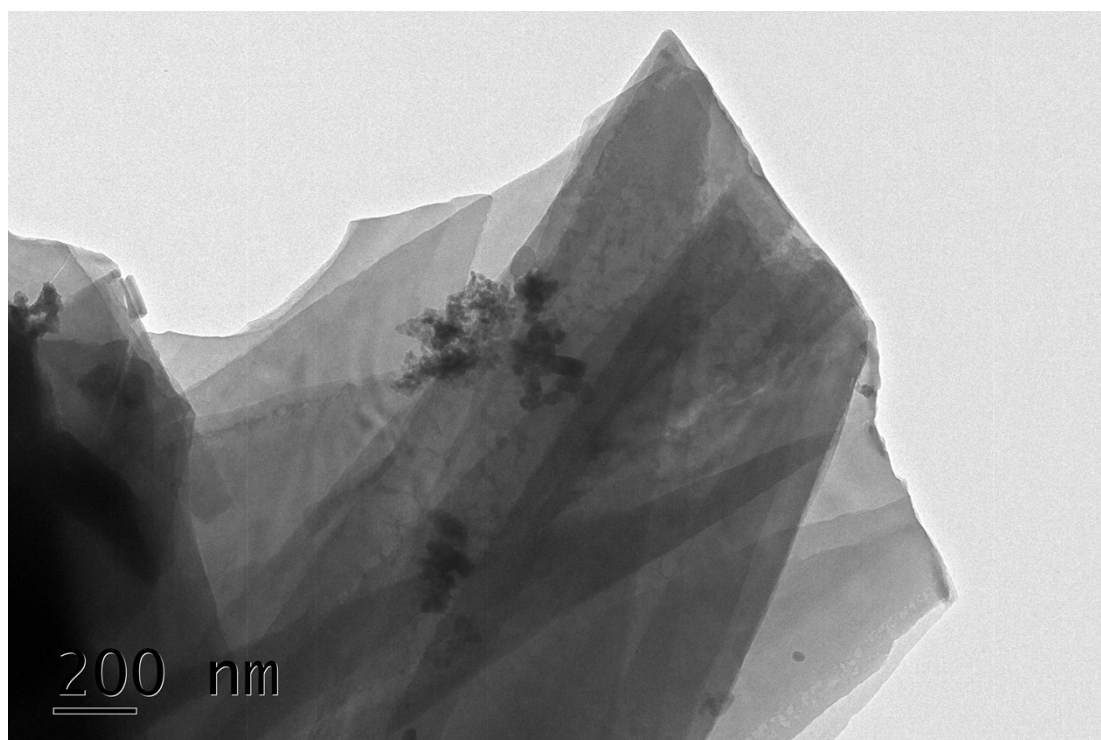

Fig. S3 TEM image of  $\text{Co}_{0.8}\text{Fe}_{0.2}\text{P}$  nanosheets at low magnification.

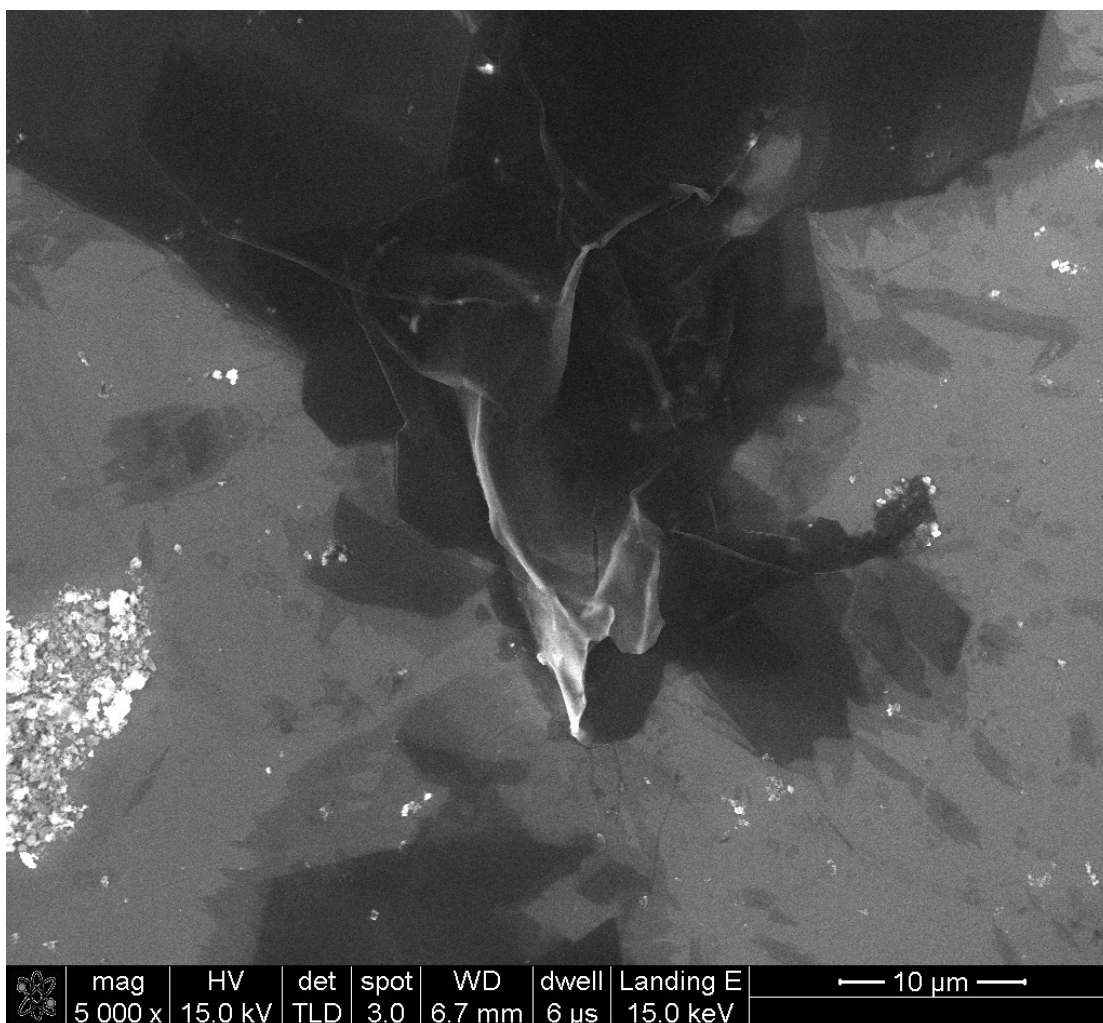

Fig. S4 SEM image of  $\text{Co}_{0.8}\text{Fe}_{0.2}\text{P}$  nanosheets at low magnification.

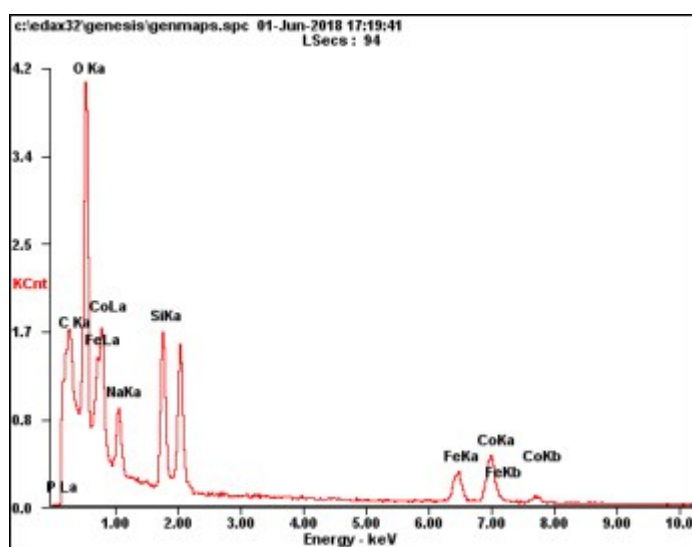

Fig. S5 EDX patterns of  $\text{Co}_{0.8}\text{Fe}_{0.2}\text{P}$  nanosheets.

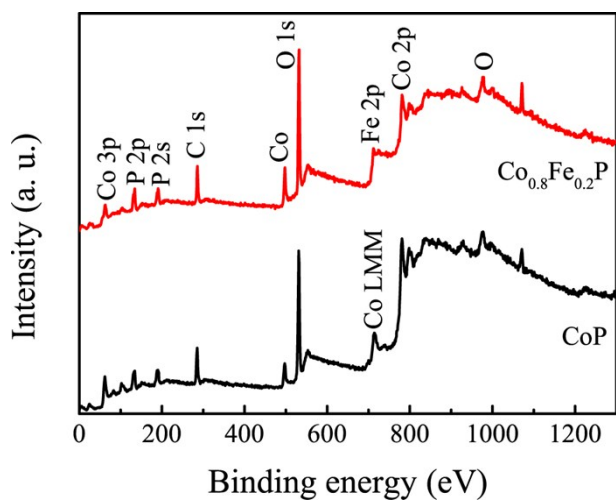

Fig S6 XPS survey scans of CoP and  $\text{Co}_{0.8}\text{Fe}_{0.2}\text{P}$  nanosheets.

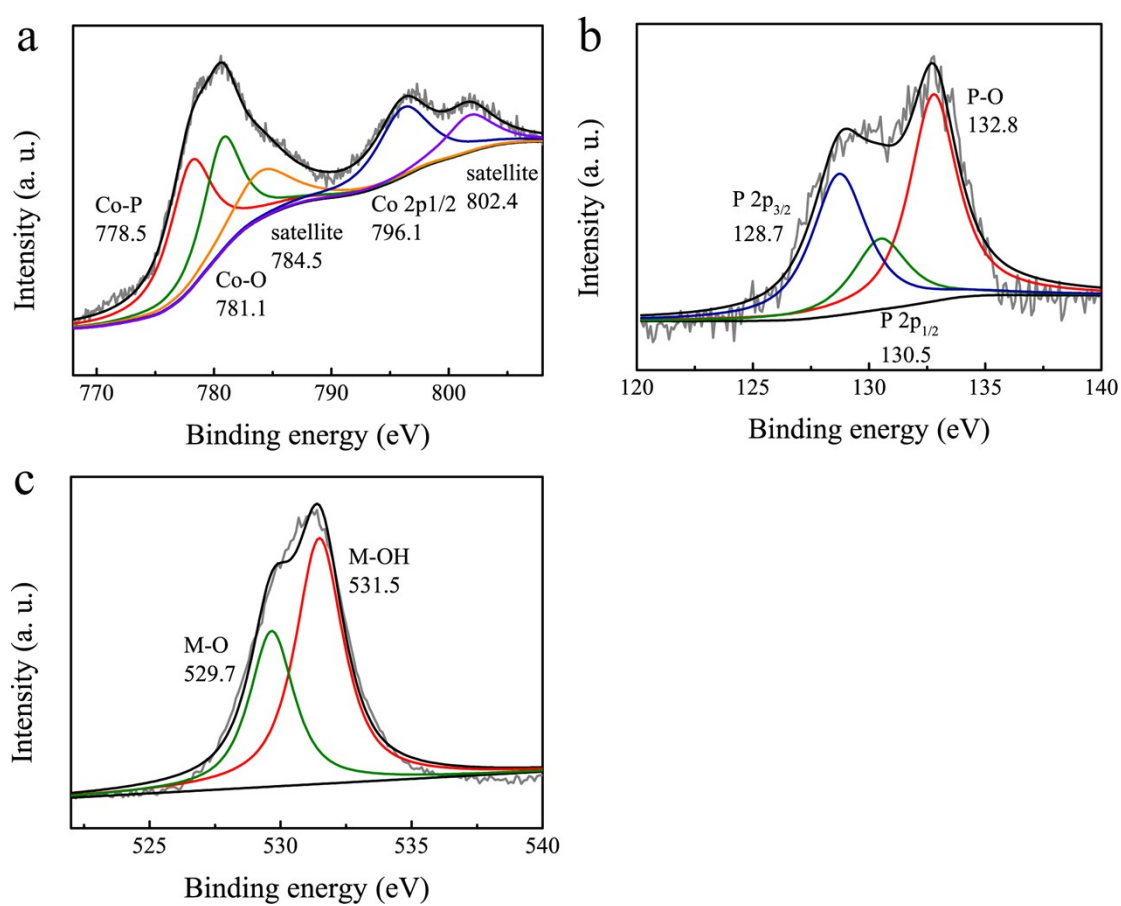

Fig. S7 XPS spectra of CoP nanosheets. (a) Co 2p, (b) P 2p and (c) O 1s.

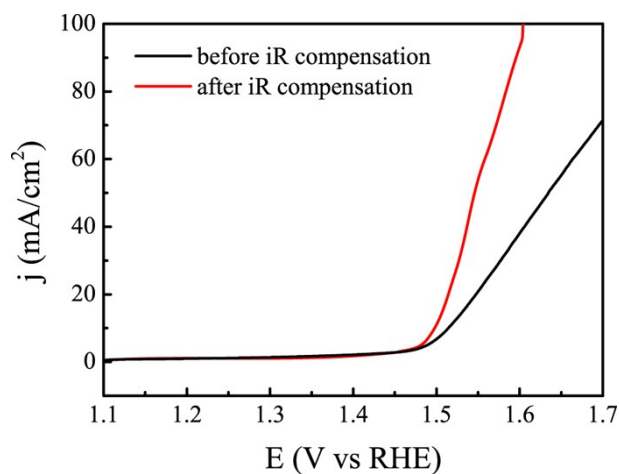

Fig. S8 The LSV curves of  $\text{Co}_{0.8}\text{Fe}_{0.2}\text{P}$  nanosheets before and after iR compensation.

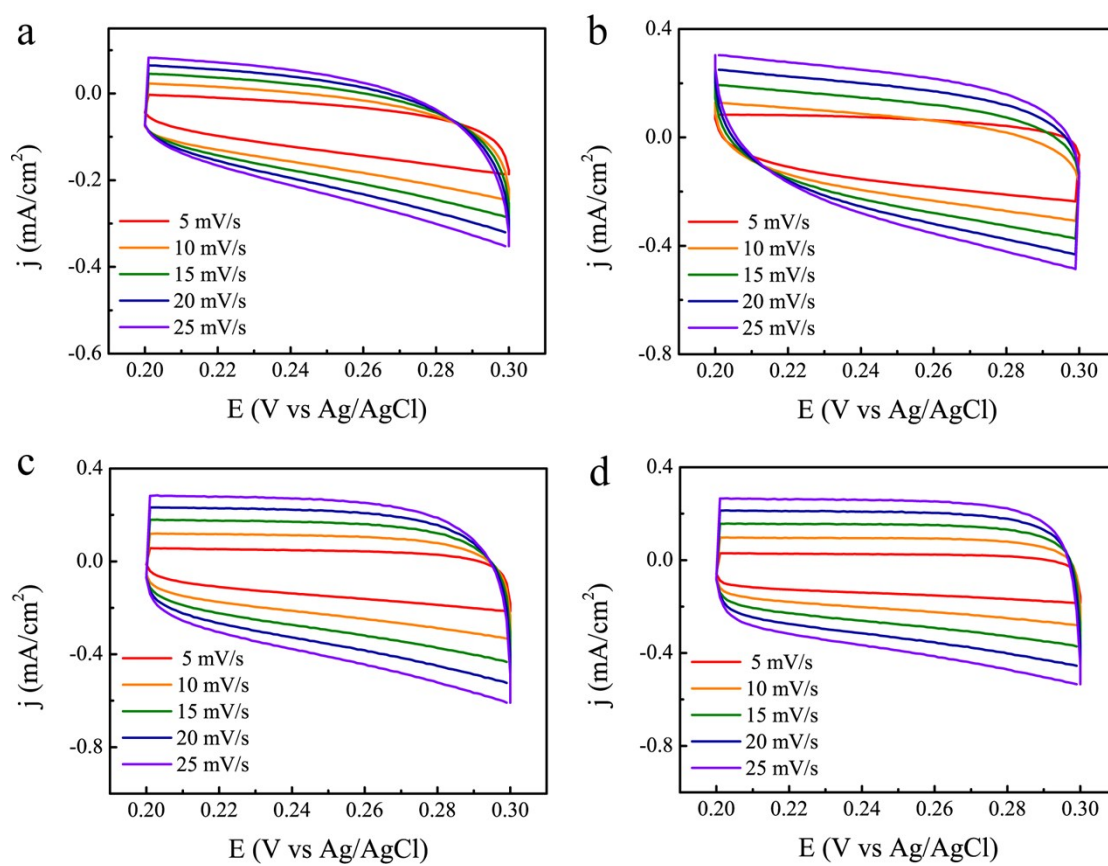

Fig. S9 Cyclic voltammetry of (a) CoP, (b)  $\text{Co}_{0.9}\text{Fe}_{0.1}\text{P}$  (c)  $\text{Co}_{0.8}\text{Fe}_{0.2}\text{P}$  and (d)  $\text{Co}_{0.7}\text{Fe}_{0.3}\text{P}$  nanosheets at different scan rate.

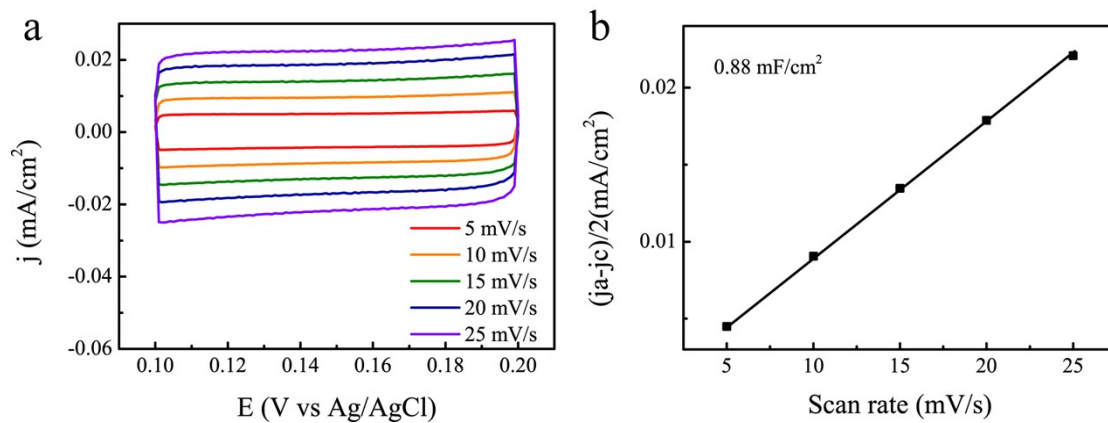

Fig. S10 (a) Cyclic voltammetry of commercial RuO<sub>2</sub>. (b) Electrical double-layer capacitance  $C_{DL}$  of commercial RuO<sub>2</sub>.

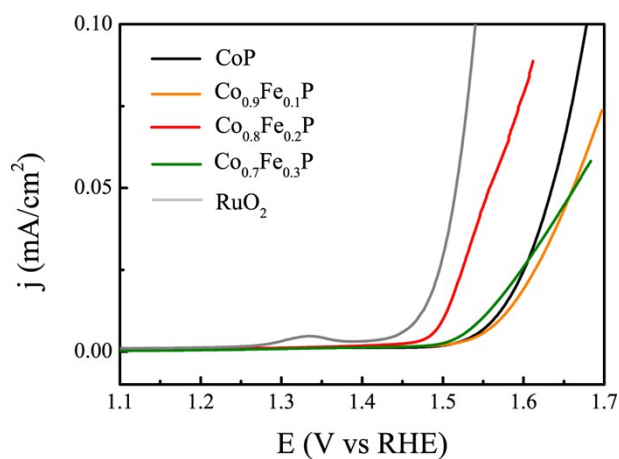

Fig. S11 LSV curves normalised by ECSA.

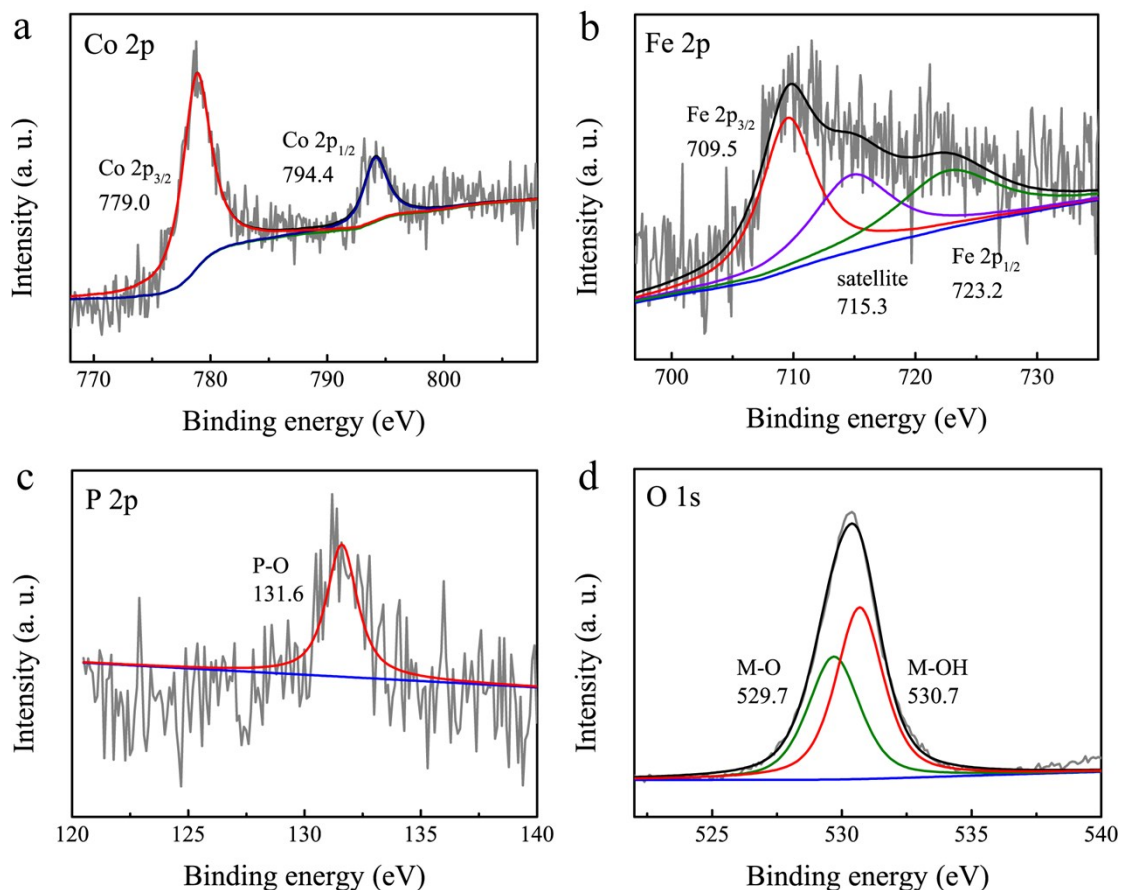

Fig. S12 XPS spectra of  $\text{Co}_{0.8}\text{Fe}_{0.2}\text{P}$  nanosheets after OER test. (a) Co 2p, (b) Fe 2p, (c) P 2p and (d) O 1s.

Table S1 Summary of various metal phosphides-based catalysts for OER. The electrolyte in these works are all 1 M KOH, the electrode in these works are all rotating disk electrode (RDE).

| Materials                                                 | Overpotential (mV)<br>at 10 mA cm <sup>-2</sup> | Tafel slope<br>(mV dec <sup>-1</sup> ) | Journal, Year,<br>volume, first page |
|-----------------------------------------------------------|-------------------------------------------------|----------------------------------------|--------------------------------------|
| 2D $\text{Co}_{0.8}\text{Fe}_{0.2}\text{P}$<br>nanosheets | 270                                             | 50                                     | This work                            |
| CoP@S,N-codoped<br>graphite carbon                        | 350                                             | 68                                     | Nanoscale, 2018,<br>10, 14613        |
| defective carbon-                                         | 320                                             | 52.5                                   | Adv. Energy                          |



|                                                       |     |      |                                      |
|-------------------------------------------------------|-----|------|--------------------------------------|
| CoP                                                   |     |      | Mater. 2018, 8, 1703623              |
| Co <sub>2</sub> P nanocrystals                        | 280 | -    | Adv. Mater. 2018, 30, 1705796        |
| Ni <sub>0.6</sub> Co <sub>1.4</sub> P                 | 300 | 80   | Adv. Funct. Mater. 2018, 28, 1706008 |
| NiCo <sub>2</sub> P <sub>x</sub> /CNTs                | 284 | 50.3 | J. Mater. Chem. A, 2018, 6, 7420     |
| NiCoP/C nanoboxes                                     | 330 | 96   | Angew. Chem. 2017, 129, 3955         |
| Co <sub>0.9</sub> S <sub>0.58</sub> P <sub>0.42</sub> | 266 | 48   | ACS Nano 2017, 11, 11031             |
| Co <sub>4</sub> Ni <sub>1</sub> P                     | 245 | 61   | Adv. Funct. Mater. 2017, 27, 1703455 |
| activated Mn-Co oxyphosphide particles                | 320 | 52   | Angew. Chem. Int. Ed. 2017, 56, 2386 |
